# Supplementary material for: Role of Satisfaction with Life, Sex and Body Mass Index in Physical Literacy of Spanish Children
Source: MDPI journal article supplement (doi:10.3390/children11020181), 2024-02-01

## CAPL-2. Canadian Assessment of Physical Literacy

# Evaluación Canadiense de la Alfabetización Física-2 (Spanish Version).

---

## ¿Qué opinas sobre la actividad física?

Cuando te preguntamos sobre la actividad física, nos referimos a cuando te mantienes activo, jugando o haciendo ejercicio. La actividad física es cualquier actividad que haga que tu corazón lata más deprisa o te deje sin aliento algunas veces.

## ¿Por qué estamos haciéndote estas preguntas?

Queremos saber lo que los/las niños/as como tú piensan sobre la actividad física, el deporte y el ejercicio.

### Por favor, recuerda:

- ¡No hay respuestas correctas o incorrectas! Solo queremos saber lo que piensas.
- Si no sabes una respuesta, por favor pon tu mejor opción.
- Tómate todo el tiempo que necesites, no hay límite.

## ¿Qué es más como yo?

Para cada pregunta tienes que leer dos frases y luego:

**1. Primero, rodea la frase que más sea como tú.**

**2. Después, pon una cruz en el cuadradito correcto dependiendo de si es MUCHO, POCO, NADA para ti.**

NO HAY RESPUESTAS CORRECTAS O INCORRECTAS, SIMPLEMENTE DINOS LO QUE PIENSAS QUE ES **MÁS COMO TÚ**.

Ejemplo 2:

|                                                                              |                                                 |                                                                               |                                                 |
|------------------------------------------------------------------------------|-------------------------------------------------|-------------------------------------------------------------------------------|-------------------------------------------------|
| <input type="radio"/> A algunos/as niños/as les gusta jugar con el ordenador | <b>PERO</b>                                     | <input type="radio"/> A otros/as niños/as no les gusta jugar con el ordenador |                                                 |
| <input type="checkbox"/> MUY VERDADERO para mi                               | <input type="checkbox"/> POCO VERDADERO para mi | <input type="checkbox"/> MUY VERDADERO para mi                                | <input type="checkbox"/> POCO VERDADERO para mi |

Recuerda, en cada cajita necesitas rodear lo que más es como tú y después poner una cruz en “realmente” o “parcialmente” cierto. Tómate tu tiempo y haz todo el formulario con cuidado. Si tienes dudas, solo pregunta.

**¡ASEGÚRATE DE RELLENAR CADA PÁGINA!**

## ¿Qué es más como yo?

|                                                                                                        |                                                 |                                                                                                         |
|--------------------------------------------------------------------------------------------------------|-------------------------------------------------|---------------------------------------------------------------------------------------------------------|
| <input type="radio"/> A algunos/as niños/as no les gusta jugar a juegos que requieren actividad física | <b>PERO</b>                                     | <input type="radio"/> A otros/as niños/as les gusta mucho jugar a juegos que requieren actividad física |
| <input type="checkbox"/> MUY VERDADERO para mi                                                         | <input type="checkbox"/> POCO VERDADERO para mi | <input type="checkbox"/> MUY VERDADERO para mi <input type="checkbox"/> POCO VERDADERO para mi          |

|                                                                              |                                                 |                                                                                                |
|------------------------------------------------------------------------------|-------------------------------------------------|------------------------------------------------------------------------------------------------|
| <input type="radio"/> A algunos/as niños/as son buenos en los juegos activos | <b>PERO</b>                                     | <input type="radio"/> Otros/as niños/as encuentran muy duros los juegos activos.               |
| <input type="checkbox"/> MUY VERDADERO para mi                               | <input type="checkbox"/> POCO VERDADERO para mi | <input type="checkbox"/> MUY VERDADERO para mi <input type="checkbox"/> POCO VERDADERO para mi |

|                                                                                           |                                                 |                                                                                                |
|-------------------------------------------------------------------------------------------|-------------------------------------------------|------------------------------------------------------------------------------------------------|
| <input type="radio"/> A algunos/as niños/as no encuentran mucha diversión en los deportes | <b>PERO</b>                                     | <input type="radio"/> Otros/as niños/as encuentran diversión en los deportes                   |
| <input type="checkbox"/> MUY VERDADERO para mi                                            | <input type="checkbox"/> POCO VERDADERO para mi | <input type="checkbox"/> MUY VERDADERO para mi <input type="checkbox"/> POCO VERDADERO para mi |

|                                                                       |                                                 |                                                                                                |
|-----------------------------------------------------------------------|-------------------------------------------------|------------------------------------------------------------------------------------------------|
| <input type="radio"/> A algunos/as niños/as se les da bien el deporte | <b>PERO</b>                                     | <input type="radio"/> A algunos/as niños/as no se les da bien el deporte                       |
| <input type="checkbox"/> MUY VERDADERO para mi                        | <input type="checkbox"/> POCO VERDADERO para mi | <input type="checkbox"/> MUY VERDADERO para mi <input type="checkbox"/> POCO VERDADERO para mi |

|                                                                            |                                                 |                                                                                                |
|----------------------------------------------------------------------------|-------------------------------------------------|------------------------------------------------------------------------------------------------|
| <input type="radio"/> A algunos/as niños/as no les gusta practicar deporte | <b>PERO</b>                                     | <input type="radio"/> Otros/as niños/as realmente se divierten practicando deporte             |
| <input type="checkbox"/> MUY VERDADERO para mi                             | <input type="checkbox"/> POCO VERDADERO para mi | <input type="checkbox"/> MUY VERDADERO para mi <input type="checkbox"/> POCO VERDADERO para mi |

|                                                                                              |                                                 |                                                                                                    |
|----------------------------------------------------------------------------------------------|-------------------------------------------------|----------------------------------------------------------------------------------------------------|
| <input type="radio"/> Algunos/as niños/as aprenden fácilmente los juegos de actividad física | <b>PERO</b>                                     | <input type="radio"/> Otros/as niños/as encuentran difícil aprender los juegos de actividad física |
| <input type="checkbox"/> MUY VERDADERO para mi                                               | <input type="checkbox"/> POCO VERDADERO para mi | <input type="checkbox"/> MUY VERDADERO para mi <input type="checkbox"/> POCO VERDADERO para mi     |

**Gracias por decirnos qué niños son más como tú.**

Solo tenemos algunas preguntas más. Por favor vuelve la hoja.

## ¿Por qué eres activo/a?

Los niños y las niñas pueden ser **activos/as** haciendo todo tipo de cosas:

- Ejercicio (andar o mantenerse en forma)
- Jugar al aire libre o hacer cosas activas (como jugar en el parque)
- Deportes (como fútbol, tenis, baile o natación)

Debajo tenemos algunas razones por las que deberías mantenerte activo/a.

**Por favor lee cada frase y dinos cómo de cierto es para ti.**

**Soy activo porque...**

|                           | NADA                     | POCO                     | A VECES                  | BASTANTE                 | MUCHO                    |
|---------------------------|--------------------------|--------------------------|--------------------------|--------------------------|--------------------------|
| Ser activo es divertido   | <input type="checkbox"/> |
| Me divierto siendo activo | <input type="checkbox"/> |
| Me gusta ser activo       | <input type="checkbox"/> |

## ¿Cómo te sientes siendo activo/a?

La siguiente sección tiene algunas frases que describen cómo las chicas y los chicos se sienten SIENDO ACTIVOS y HACIENDO COSAS ACTIVAS (como jugar a juegos que requieren actividad física, jugar al aire libre o hacer deporte).

**Por favor lee cada frase y dinos cuánto se parecen a ti cada una de ellas.**

|                                                                                                | NADA                     | POCO                     | A VECES                  | BASTANTE                 | MUCHO                    |
|------------------------------------------------------------------------------------------------|--------------------------|--------------------------|--------------------------|--------------------------|--------------------------|
| Cuando se trata de jugar a juegos que implican actividad física, creo que soy bastante bueno/a | <input type="checkbox"/> |
| Creo que lo hago bien en las actividades comparado con otros/as niños/as                       | <input type="checkbox"/> |
| Cuando se trata de ser activo/a, tengo buenas habilidades                                      | <input type="checkbox"/> |

**1. ¿Cuántos minutos cada día deberíais hacer actividades física que haga que vuestro corazón lata más deprisa y os haga respirar más rápido, como caminar rápido o correr? Que tiempo deberías estar activo en el colegio y también cuando estás en casa o en tu barrio.**

- a) 20 minutos.
- b) 30 minutos.
- c) 60 minutos o 1 hora.
- d) 120 minutos o 2 horas.

**2. Hay muchos tipos de aptitudes físicas. Una se llama resistencia, o capacidad aeróbica, o acondicionamiento cardiorrespiratorio. El acondicionamiento cardiorrespiratorio significa:**

- a) Lo bien que los músculos pueden empujar, tirar o estirar.
- b) Lo bien que el corazón puede bombear sangre y los pulmones pueden proporcionar oxígeno.
- c) Tener un peso saludable para nuestra altura.
- d) Nuestra habilidad para practicar los deportes que nos gustan.

**3. La fuerza muscular o resistencia muscular significa:**

- a) Lo bien que los músculos pueden empujar, tirar o estirar.
- b) Lo bien que el corazón puede bombear sangre y los pulmones pueden proporcionar oxígeno.
- c) Tener un peso saludable para nuestra altura.
- d) Nuestra habilidad para practicar deportes que nos gustan.

**4. Si quisieras mejorar en una habilidad deportiva (como darle una patada a un balón o atraparlo), ¿Qué sería lo mejor que podrías hacer?**

- a) Leer un libro de cómo darle una patada y atrapar un balón.
- b) Esperar a ser mayor.
- c) Intentar ejercitar o ser más activo/a.
- d) Ver un video, recibir una clase, o tener un entrenador para que te enseñe cómo darle una patada y atrapar un balón.

5. En esta historia sobre Ana hay palabras que faltan. Elige las palabras del cuadro para rellenar los huecos que faltan en la historia. Solo puedes usar una palabra para rellenar cada espacio en blanco en la historia. Hay más palabras que espacios en blanco, así que no utilizaremos todas las palabras.

|        |             |              |             |
|--------|-------------|--------------|-------------|
|        | Divertida   | Estira       | Resistencia |
| Pulso  | Respiración | Flexibilidad | Bueno       |
| Fuerza | Malo        | Deporte      |             |

Ana intenta mantenerse activa todos los días. Correr diariamente es bueno para su corazón y sus pulmones. Ana cree que la actividad física es \_\_\_\_\_ y también es \_\_\_\_\_ para ella. Cuando entrena con su equipo ella corre más para mejorar su \_\_\_\_\_. Su equipo también hace ejercicios como flexiones y sentadillas que aumentan su \_\_\_\_\_. Cuando se enfría, \_\_\_\_\_ para mejorar su flexibilidad y disminuir la frecuencia cardíaca. Después de hacer ejercicio, ella comprueba su frecuencia cardíaca lo que también llamamos \_\_\_\_\_.

6. Durante la semana pasada (7 días), ¿Qué días te mantuviste activo/a durante un total de al menos 1 h o 60 minutos por día? Cuenta todo el tiempo que pasaste haciendo actividades que aumentaron tu frecuencia cardíaca o que te hicieron respirar profundamente.

He estado activo/a durante    1    2    3    4    5    6    7    días.

## Cuéntanos sobre ti...

Por favor rodea un número o una palabra para cada pregunta.

### ¿En qué curso estas?

Si no está en la escuela hoy, marque con un círculo el grado en el que ingresará el próximo día que irá a la escuela.

|  |    |    |    |                 |    |    |  |    |            |
|--|----|----|----|-----------------|----|----|--|----|------------|
|  |    |    |    | <b>PRIMARIA</b> |    |    |  |    | <b>ESO</b> |
|  | 1º | 2º | 3º | 4º              | 5º | 6º |  | 1º |            |

**Eres:**    niño            niña

### ¿Qué mes es tu cumpleaños?:

Enero   Febrero   Marzo   Abril   Mayo   Junio   Julio   Agosto   Septiembre   Octubre   Noviembre   Diciembre

### ¿Cuántos años tienes?:

7      8      9      10      11      12      13

**¡Gracias por responder nuestras preguntas!**

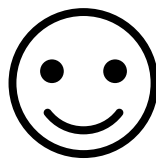

Supplement: s1 [file s1]
